# Supplementary material
Source: PubMed Central journal article supplement (PMC3370278)
Supplement: mmc1.pdf [file mmc1.pdf]

## Supplemental Data

### Mutations of the Mitochondrial-tRNA Modifier *MTO1*

### Cause Hypertrophic Cardiomyopathy and Lactic Acidosis

Daniele Ghezzi, Enrico Baruffini, Tobias B. Haack, Federica Invernizzi, Laura Melchionda, Cristina Dallabona, Tim M. Strom, Rossella Parini, Alberto B. Burlina, Thomas Meitinger, Holger Prokisch, Ileana Ferrero, and Massimo Zeviani

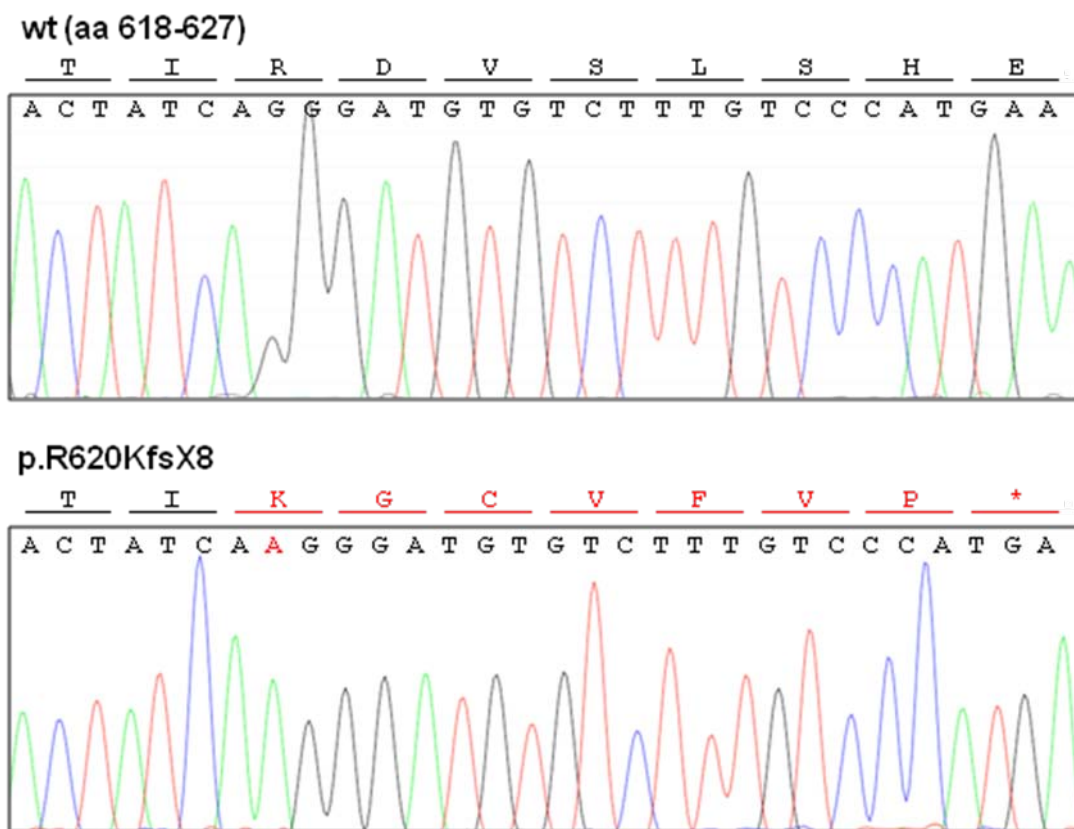

**Figure S1. Sequence Analysis of c.1858dup**

Electropherograms of the *MTO1* region around the c.1858dup mutation. The *MTO1* cDNA obtained by retro-transcription of RNA from fibroblasts of patient 2 was subcloned into pCR2.1 vector (Invitrogen) in order to separate the two alleles: the lower panel shows the allele carrying the c.1858dup, p.Arg620Lysfs\*8 mutation; the upper panel shows a wt sequence belonging to the allele carrying the c.1282G>A, p.Ala431Thr, mutation.

**A.**

NP\_598400.1 | 404FAGQINGTTGYEEAAAQGVIAGINASLRVSRK  
XP\_527435.2 | 404FAGQINGTTGYEEAAAQGVIAGINASLRVSRK  
XP\_532202.2 | 404FAGQINGTTGYEEAAAQGVIAGINASLRVKHK  
NP\_001069537.1 | 404FAGQINGTTGYEEAAAQGVIAGINASLRVKHK  
NP\_080934.1 | 403FAGQINGTTGYEEAAAQGVIAGINASLRVSRK  
XP\_001235453.1 | 397FAGQINGTTGYEEAAAQGVIAGINACLRVQGK  
NP\_001076478.1 | 397LAGQINGTTGYEEAAAQGLWAGVNAAGRTSLSM  
NP\_611677.1 | 396FAGQINGTTGYEEAAAQGIIAGANAAGKTRHS  
XP\_308209.4 | 401LAGQINGTTGYEEAAAQGLLAGANAASALAR  
NP\_496169.1 | 376LAGQINGTTGYEEAAAQGVVAGINASARAQNE  
NP\_011278.2 | 407LAGQINGTTGYEEAAAQGI IAGINAGLLSRQE  
XP\_451040.1 | 418LAGQINGTTGYEEACAQGVVAGINAGLSARG-  
XP\_956189.2 | 409LAGQINGTTGYEEAAGQGIVAGINAGRAATG-  
NP\_595531.1 | 385LAGQINGTTGYEEAAAQGILAGLNAGLSALG-  
NP\_178974.1 | 434FSGQINGTTGYEEAAAQGIISGINAARHADGK  
NP\_001045465.1 | 429FSGQINGTTGYEEAAAQGIISGINAARHSDGK

: :\*\*\*\*\*\_\*\* : \* \*\*

**B.**

```
yMTO1_wt           MLRVTTLAS-SCTSFPQLVLRRLTISLTSFQPTTKTQVVVIGAGHAGCEAAAASSRTG 59
yMTO1_P622*       MLRVTTLAS-SCTSFPQLVLRRLTISLTSFQPTTKTQVVVIGAGHAGCEAAAASSRTG 59
hMTO1_wt           MFYFRGCGRWVAVSFTKQQFP-LARLSSDSAAPRTPHFVIVIGGGHAGTEAATAAARCG 59
hMTO1_R620Kfs*8   MFYFRGCGRWVAVSFTKQQFP-LARLSSDSAAPRTPHFVIVIGGGHAGTEAATAAARCG 59
                   *: . . . . . ** . * : : ** : : * : : * : * : * : * : * : * : *

yMTO1_wt           AHTTLITPSLTDIGKCSNPSIGGVGKILVKEIDALDGLMGKVTDLAGVQFKMLNRSKG 119
yMTO1_P622*       AHTTLITPSLTDIGKCSNPSIGGVGKILVKEIDALDGLMGKVTDLAGVQFKMLNRSKG 119
hMTO1_wt           SRLLLLTHRVDITIGMSCNPSFGGIGKGLMREVDALDGLCSRICDQSGVHYKVLNRKKG 119
hMTO1_R620Kfs*8   SRLLLLTHRVDITIGMSCNPSFGGIGKGLMREVDALDGLCSRICDQSGVHYKVLNRKKG 119
                   : : * * : : : * : : * : * : * : * : * : * : * : * : * : * : *

yMTO1_wt           PAVWGPRAQIDRELYKKYMQRELSDKKAHPNLSLLQNKVADLILYDPG---CGHKVIKGV 176
yMTO1_P622*       PAVWGPRAQIDRELYKKYMQRELSDKKAHPNLSLLQNKVADLILYDPG---CGHKVIKGV 176
hMTO1_wt           PAVWGLRAQIDRKLYKQNMQKEILN---TPLLTVQEGAVEDLILTEPEPEHTGKCRVSGV 176
hMTO1_R620Kfs*8   PAVWGLRAQIDRKLYKQNMQKEILN---TPLLTVQEGAVEDLILTEPEPEHTGKCRVSGV 176
                   ***** : * : * : * : * : * : * : * : * : * : * : * : * : * : *

yMTO1_wt           VLDDGTQVGADQVIITTTGTFLSAEIHIGDKRIAAGRIGEPTYGISNTLQNEVGFQLGRL 236
yMTO1_P622*       VLDDGTQVGADQVIITTTGTFLSAEIHIGDKRIAAGRIGEPTYGISNTLQNEVGFQLGRL 236
hMTO1_wt           VLVDGSTVYAESVILTTGTFLRGMIVIGLETHPAGRLGDQPSIGLAQTLE-KLGFVVGRLL 235
hMTO1_R620Kfs*8   VLVDGSTVYAESVILTTGTFLRGMIVIGLETHPAGRLGDQPSIGLAQTLE-KLGFVVGRLL 235
                   ** * : * * : * : * : * : * : * : * : * : * : * : * : * : * : *

yMTO1_wt           KTGTPARLAKESIDFSALEVQKGDALPVPMSFLNETVSVPEPKQLDCFGTHTTPQMHDFFL 296
yMTO1_P622*       KTGTPARLAKESIDFSALEVQKGDALPVPMSFLNETVSVPEPKQLDCFGTHTTPQMHDFFL 296
hMTO1_wt           KTGTPPRIAKESINFSILNKHIPDNPSIPFSFTNETVWIKPEDQLPCYLTHTNPRVDEIV 295
hMTO1_R620Kfs*8   KTGTPPRIAKESINFSILNKHIPDNPSIPFSFTNETVWIKPEDQLPCYLTHTNPRVDEIV 295
                   ***** : * : * : * : * : * : * : * : * : * : * : * : * : * : *

yMTO1_wt           RNNLHQSIHIQDTTIKGPRYCPSEIAKILRFPDRSSHKIWLEPEGFNSDVIYPNGISNSM 356
yMTO1_P622*       RNNLHQSIHIQDTTIKGPRYCPSEIAKILRFPDRSSHKIWLEPEGFNSDVIYPNGISNSM 356
hMTO1_wt           LKNLHLNLSHVKEETTR-GPRYCPSEISKVLRFPNR-LHQVWLEPEGMDSDLIYPQGLSMTL 353
hMTO1_R620Kfs*8   LKNLHLNLSHVKEETTR-GPRYCPSEISKVLRFPNR-LHQVWLEPEGMDSDLIYPQGLSMTL 353
                   : * * . * : : * * * : * : * : * : * : * : * : * : * : * : * : * : *

yMTO1_wt           PEDVQLQMMRLIPGMANVEILQPAYGVEYDYVDRQLKPSLETKLVDGLFLAGQINGTTG 416
yMTO1_P622*       PEDVQLQMMRLIPGMANVEILQPAYGVEYDYVDRQLKPSLETKLVDGLFLAGQINGTTG 416
hMTO1_wt           PAELQEKMITCIRGLEKAKVIQPGYGVQYDYLDRPQITPSLETHLVQRLFFAGQINGTTG 413
hMTO1_R620Kfs*8   PAELQEKMITCIRGLEKAKVIQPGYGVQYDYLDRPQITPSLETHLVQRLFFAGQINGTTG 413
                   * : * * : * : * * : : : * : * : * : * : * : * : * : * : * : *

yMTO1_wt           YEEAAAQGI IAGINAGLLSRQEREQLVLRSEAYIGVLIDDLNNGVIEPYRMFTSRSEF 476
yMTO1_P622*       YEEAAAQGI IAGINAGLLSRQEREQLVLRSEAYIGVLIDDLNNGVIEPYRMFTSRSEF 476
hMTO1_wt           YEEAAAQGV IAGINASLRVSR-KPPFVVSRTEGYIGVLIDDLTTLGTSEPYRMFTSRVEF 472
hMTO1_R620Kfs*8   YEEAAAQGV IAGINASLRVSR-KPPFVVSRTEGYIGVLIDDLTTLGTSEPYRMFTSRVEF 472
                   ***** : * : * : * : * : * : * : * : * : * : * : * : * : * : *

yMTO1_wt           RISVRADNADFRLTPIG-AQLGIISPVRLSQYSRDKHLYDETIRALQNFKLSSQKWSSLL 535
yMTO1_P622*       RISVRADNADFRLTPIG-AQLGIISPVRLSQYSRDKHLYDETIRALQNFKLSSQKWSSLL 535
hMTO1_wt           RLSLRPDNADSRLLTRGYKDAGCVSQQRYERACWMKSSLEEGISVLKSI EFLSSKWKKLI 532
hMTO1_R620Kfs*8   RLSLRPDNADSRLLTRGYKDAGCVSQQRYERACWMKSSLEEGISVLKSI EFLSSKWKKLI 532
                   * : * : * : * : * : * : * : * : * : * : * : * : * : * : *

yMTO1_wt           -QANIAP-QAENRSAWEIFRFKMDLHKLYECIPDLPINLLDIPMHVVTKINI QGKYEPY 593
yMTO1_P622*       -QANIAP-QAENRSAWEIFRFKMDLHKLYECIPDLPINLLDIPMHVVTKINI QGKYEPY 593
hMTO1_wt           PEASISTSRSLPVRALDVLKYEEDMDSLAKAVP-EPLKKYTKCRELAERLKI EATYESV 591
hMTO1_R620Kfs*8   PEASISTSRSLPVRALDVLKYEEDMDSLAKAVP-EPLKKYTKCRELAERLKI EATYESV 591
                   : * . * . : : * : : : : * : * : * : * : * : * : * : * : * : *

yMTO1_wt           IVKQNQFVKAFQADENMLLPQDYDYRQLP--TLSTECKLLLNRVQPLTIGQARRIQGITA 651
yMTO1_P622*       IVKQNQFVKAFQADENMLLPQDYDYRQLP----- 621
hMTO1_wt           LFHQQLQEIKGVQQDEALQPKDLDYLTIRDVLSHEVREKLFHFRPQTIGAASRIPGVTP 651
hMTO1_R620Kfs*8   LFHQQLQEIKGVQQDEALQPKDLDYLTIKGCVFVP----- 626
                   : : * * : * . * * : * : * * : : * * : : * : * * * * * * : *

yMTO1_wt           AALFELYRVARKPS--QPVM----- 669
yMTO1_P622*       ----- 669
hMTO1_wt           AAIIINLLRFVKTQRRQSAMNESSKTDQYLCDADRLQEREL 692
hMTO1_R620Kfs*8   ----- 692
                   * : : : * * . : . . . * . *
```

## Figure S2. Comparative Sequence Analysis of MTO1

(A) Interspecies alignment of MTO1 protein sequences, obtained by ClustalW software online.

Accession numbers: NP\_598400.1 [*Homo sapiens*]; XP\_527435.2 [*Pan troglodytes*]; XP\_532202.2 [*Canis familiaris*]; NP\_001069537.1 [*Bos taurus*]; NP\_080934.1 [*Mus musculus*]; XP\_001235453.1 [*Gallus gallus*]; NP\_001076478.1 [*Danio rerio*]; NP\_611677.1 [*Drosophila melanogaster*]; XP\_308209.4 [*Anopheles gambiae* str. PEST]; NP\_496169.1 [*Caenorhabditis elegans*]; NP\_595531.1 [*Schizosaccharomyces pombe* 972h-]; NP\_011278.2 [*Saccharomyces cerevisiae* S288c]; XP\_451040.1 [*Kluyveromyces lactis* NRRL Y-1140]; XP\_956189.2 [*Neurospora crassa* OR74A]; NP\_178974.1 [*Arabidopsis thaliana*]; NP\_001045465.1 [*Oryza sativa* Japonica Group].

(B) ClustalW alignment between human (h) and yeast (y) wt and mutant MTO1 protein sequences.

The conserved human Alanine residue in position 428, which is replaced by a Threonine in our patients, and the corresponding Alanine in position 431 of the yeast protein, are highlighted in yellow.

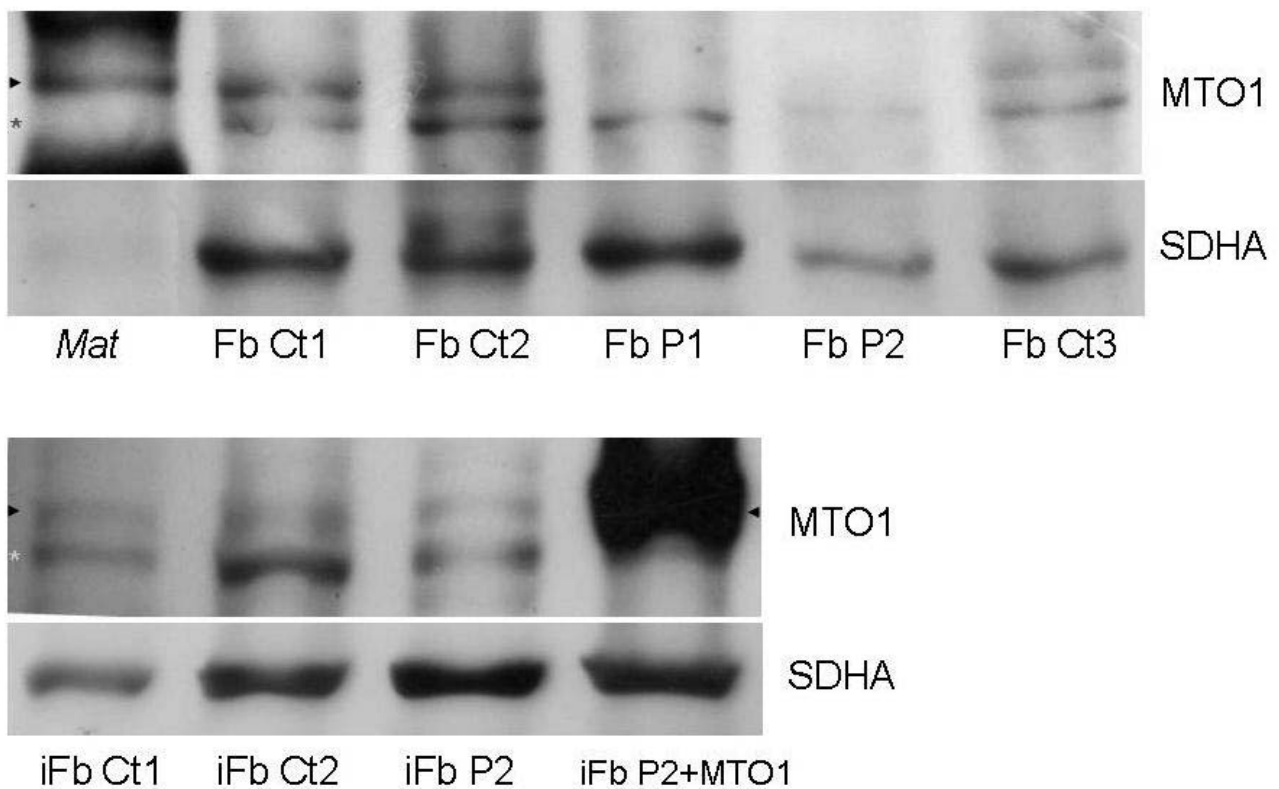

**Figure S3. Western-Blot Analysis of MTO1 in Fibroblast Lysates**

*Top panel.* Primary fibroblasts

Samples obtained from persons 1 and 2 (P1, P2) and controls (Ct1, Ct2, Ct3) fibroblasts (Fb) were loaded on 10% SDS-PAGE gel, blotted and immunovisualized with an anti-MTO1 antibody. A black arrow indicates the band corresponding to the *in vitro* synthesized mature MTO1 protein (*Mat*). An unspecific signal is present in fibroblasts (grey asterisks). SDHA was used as loading control.

*Bottom panel.* Immortalized fibroblasts and *MTO1* transduction

Immortalized fibroblast (iFb) lysates of person 2 (P2) and controls (Ct1, Ct2). “iFb P2+MTO1” corresponds to cellular lysate obtained from immortalized P2 fibroblasts, overexpressing wild-type MTO1. A black arrow indicates the band corresponding to mature MTO1. An unspecific signal is present in fibroblasts (grey asterisks). SDHA was used as loading control.

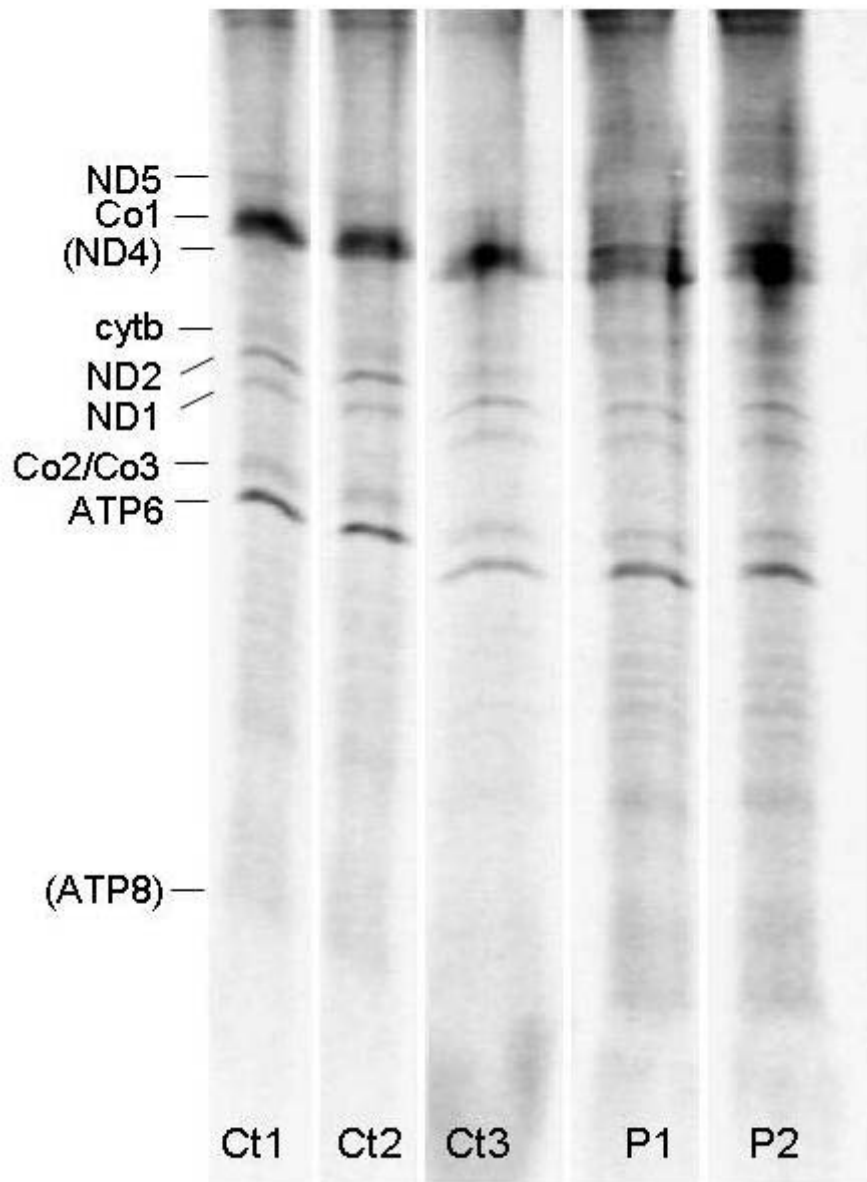

**Figure S4. Mitochondrial Protein Synthesis in Fibroblasts**

The assay was performed in fibroblasts from three controls (Ct1-Ct3) and persons P1 and P2. The mitochondrial translation products on the SDS-polyacrylamide gel are indicated according to ref. 7.

**Table S1. Variants Identified in Individual 2 by Exome Sequencing**

|                                                           |                   |
|-----------------------------------------------------------|-------------------|
| <b>Individual ID</b>                                      | <b>#55554</b>     |
| Synonymous variants                                       | 11140             |
| NSV                                                       | 10196             |
| NSV with frequency <0.2% in “in-house” + public databases | 331               |
| ≥2 NSV / gene                                             | 14                |
| known disease allele                                      | 0                 |
| known MRC subunits and assembly factors                   | 0                 |
| mitochondrial localization                                | 1 ( <i>MTO1</i> ) |

NSV = missense, nonsense, stop-loss, splice-site disruption, insertions, deletions; mitochondrial

localization refers to proteins with a MitoP2 score > 0.5.

**Table S2. Primers Used for Yeast Studies\***

| Name        | Sequence                                       | PCR products and notes                                                                              |
|-------------|------------------------------------------------|-----------------------------------------------------------------------------------------------------|
| MTO1CFw     | ggggggtcgacgcttactgccactattagtcacg             | Primers amplifying the entire <i>yMTO1</i> gene, encompassing both promoter and termination regions |
| MTO1CRv     | ggggggagctccgacagtgagttgcccttttgc              |                                                                                                     |
| MTO1A431TFw | ggatcattgcaggtatcaataccggattactatcgcgccaagaacg | Primers specific for the amplification of the A431T <i>yMTO1</i> mutant variant                     |
| MTO1A431TRv | cgttcttggcgcgatagtaatccggtattgatacctgcaatgatcc |                                                                                                     |
| MTO1P622*Fw | gattacgattaccgtcagttatgatagcttccactgaatgcaaac  | Primers specific for the amplification of the P622* <i>yMTO1</i> mutant variant                     |
| MTO1P622*Rv | gtttgcattcagtggaagctatcataactgacggtaatcgtaatc  |                                                                                                     |

\* The yeast strains used in this study are BY4741 *mto1* (*MATa his3Δ0 leu2Δ0 met15Δ0 ura3Δ0 mto1::Kan<sup>R</sup>*) (Euroscarf collection) and W303 P<sup>R</sup>*mto1* (*MAT trp1-1 mto1::URA3*). *MTO1* PCR-products were cloned in centromeric plasmids pFL38 or pFL39. Mutagenesis of *MTO1* was performed using the overlap extension technique (Ho et al., 1989) by using external primers MTO1CFw and MTO1CRv and internal mutagenic primers. *mto1* strains were transformed with plasmids harboring wt or mutant *MTO1* alleles by lithium acetate methods (Gietz and Woods, 2002).

### Supplemental References

Gietz RD, Woods RA. (2002) Transformation of yeast by lithium acetate/single-stranded carrier DNA/polyethylene glycol method. *Methods Enzymol*; 350:87-96.

Ho SN, Hunt HD, Horton RM, Pullen JK, Pease LR (1989) Site-directed mutagenesis by overlap extension using the polymerase chain reaction. *Gene*; 77:51-9.
